# Supplementary material
Source: Research Square preprint supplement (doi:10.21203/rs.3.rs-9656854/v1)
Supplement: Supplementary file 1 [file 03aa9ccc40cba8c1c4e068d7.docx]

| **Table 1.** Number of participants in the PP population for three study visits that are relevant for the statistical modelling. | | | | |
| --- | --- | --- | --- | --- |
|  |  | **Intervention groups** | | **Reference group** |
|  | Overall | 5-MTHF-Ca | Folic acid | breastfed infants |
| **Visit** | n | n | n | n |
| BV (baseline, age <4 weeks) | 244 | 71 | 83 | 90 |
| V4 (at 4 months) | 244 | 71 | 83 | 90 |
| FUV (at 12 months) | 230 | 66 | 79 | 85 |
| *Dropouts between V4 and FUV* | *14* | *5* | *4* | *5* |
