# Supplementary material
Source: Research Square preprint supplement (doi:10.21203/rs.3.rs-9656854/v1)
Supplement: Supplementary file 2 [file 4dbea7f20d9de9e8218ba5b1.docx]

| **Table 2.** Anthropometric measurements of infants at age of 12 months (FUV) in the PP population. | | | |
| --- | --- | --- | --- |
| **BV (baseline visit)** | **5-MTHF-Ca** N = 71 | **Folic acid** N = 83 | **Reference** N = 90 |
| Female sex, n (%) | 31 (43.7%) | 37 (44.6%) | 47 (52.2%) |
| Birthweight (g) | 3,394 (423); [2,580, 4,290] | 3,480 (383); [2,570, 4,470] | 3,467 (361); [2,600, 4,360] |
| Age (days) | 21.0 (3.7); [13.0, 27.0] | 19.4 (3.35); [9.0, 26.0] | 19.7 (2.6); [12.0, 26.0] |
| Body weight (g) | 3,826 (409); [3,000, 4,700] | 3,798 (398); [2,460, 4,920] | 3,928 (419); [2,975, 4,830] |
| Body length (cm) | 53.9 (1.8); [50.0, 59.0] | 53.9 (2.1); [47.0, 59.0] | 54.1 (1.8); [50.0, 58.0] |
| Head circumference (cm) | 36.3 (1.0); [34.0, 38.50] | 36.0 (1.2); [33.0, 38.0] | 36.3 (1.1); [33.5, 39.0] |
|  | | | |
| **V4 (visit 4 at 4 months)** | **5-MTHF-Ca** N = 71 | **Folic acid** N = 83 | **Reference** N = 90 |
| Female sex, n (%) | 31 (43.7%) | 37 (44.6%) | 47 (52.2%) |
| Birthweight (g) | 3,394 (423); [2,580, 4,290] | 3,480 (383); [2,570, 4,470] | 3,467 (361); [2,600, 4,360] |
| Age (days) | 112.8 (1.2); [110.0, 115.0] | 112.7 (1.1); [109.0, 115.0] | 112.7 (1.0); [110.0, 114.0] |
| *Intervention duration (days)* | *92 (4); [83, 100]* | *93 (3); [86, 103]* | *93 (3); [88, 101]* |
| Body weight (g) | 6,717 (642); [5,330, 8,155] | 6,819 (645); [5,480, 8,735] | 6,624 (678); [5,075, 8,600] |
| Body length (cm) | 64.1 (1.9); [59.40, 68.0] | 64.4 (2.0); [60.0, 69.5] | 64.2 (2.1); [59.3, 68.6] |
| Head circumference (cm) | 41.4 (1.1); [39.0, 44.0] | 41.3 (1.2); [38.6, 44.0] | 41.4 (1.3); [38.5, 44.5] |
|  | | | |
| **FUV (follow up visit at 12 months)** | **5-MTHF-Ca** N = 66 | **Folic acid** N = 79 | **Reference** N = 85 |
| Female sex, n (%) | 29 (43.94%) | 34 (43.04%) | 45 (52.94%) |
| Birthweight (g) | 3,403 (430); [2,580, 4,290] | 3,472 (390); [2,570, 4,470] | 3,464 (366); [2,600, 4,360] |
| Age (days) | 363.8 (8.4); [316.0, 387.0] | 364.8 (4.8); [357.0, 386.0] | 365.1 (2.7); [360.0, 378.0] |
| Body weight (g) | 10,231 (1,137); [7,950, 13,745] | 10,221 (1,077); [8,015, 13,000] | 9,848 (1,159); [7,470, 14,000] |
| Body length (cm) | 77.3 (2.4); [71.5, 82.2] | 77.63 (2.35); [71.50, 84.45] | 76.56 (2.76); [70.0, 83.10] |
| Head circumference (cm) | 46.4 (1.3); [43.2, 49.0] | 46.3 (1.4); [43.0, 49.0] | 46.2 (1.5); [42.0, 51.0] |
| Continuous variables are shown as mean (SD), and range [Min, Max]. For sex the number of observations and the proportion (%) are shown. | | | |
