# Supplementary material
Source: Research Square preprint supplement (doi:10.21203/rs.3.rs-9656854/v1)
Supplement: Supplementary file 3 [file 61f549b801d526930c4efe63.docx]

| **Table 3.** Blood safety parameters of the PP population at age 12 months. | | | |
| --- | --- | --- | --- |
| Parameters | **5-MTHF-Ca**  N = 66 | **Folic acid**  N = 79 | **Reference**  N = 85 |
| Hemoglobin (g/L) | 121 (8.9); [100, 150] | 122 (8.4); [98, 135] | 117 (7.5); [95, 133] |
| Proportion within normal range of hemoglobin [105, 135] g/L* | 93.9% | 96.2% | 94.1% |
| Hematocrit (%) | 0.35 (0.02); [0.30, 0.40] | 0.35 (0.02); [0.30, 0.40] | 0.34 (0.02); [0.30, 0.38] |
| Proportion within normal range of Hematocrit [0.34, 0.44] % | 69.7% | 73.4% | 52.9% |
| MCV (fL) | 75.6 (4.0); [63.0, 83.6] | 75.1 (3.5); [65.6, 81.9] | 73.6 (4.9); [56.9, 83.3] |
| Proportion within normal range of MCV [70, 86] fL * | 92.4% | 93.7% | 82.4% |
| Hematology markers are shown as mean (SD) and range [Min, Max] for infants in the per-protocol (PP) population. MCV: mean corpuscular volume, n: number of subjects. The infant formula contained either folic acid (15.2 µg/100 kcal) or an equimolar amount of 5-MTHF-Ca (15.8 µg/100 kcal) starting in the first 28 days of life until 4 months of age. Breastfed infants were recruited as a reference group, but were not randomized and did not receive any intervention. | | | |
